# Supplementary material
Source: PubMed Central journal article supplement (PMC10746262)
Supplement: NIHMS1933379-supplement-323200_Uncut_Gel_Blots.pdf [file NIHMS1933379-supplement-323200_Uncut_Gel_Blots.pdf]

# Myocardial Recovery in Recent Onset Dilated Cardiomyopathy: Role of the *CDCP1* and Cardiac Fibrosis

Original Western Blots (pre-cut)

# Introduction

1. All Western blot pictures were obtained by using a **Bio-Rad ChemiDoc Touch Imaging System**.
2. On a same blot (PVDF membrane), **protein band** was visualized by **Chemiluminescence** picture, and **prestained protein marker** was visualized by **Colormetric** picture.
3. A Bio-Rad Precision Plus Protein Dual Color Standards (#1610374) was used in all blots in this study.
4. Chemiluminescence picture and Colormetric picture were **Merged** to show the size of band (see pictures below).
5. All pre-cut blots showing in subsequent slides are Merged pictures with **red-dashed box** to indicate cut blot that was presented in Figures. (see pictures below for example: red-dashed box corresponding to **Supplementary Figure S8A**)

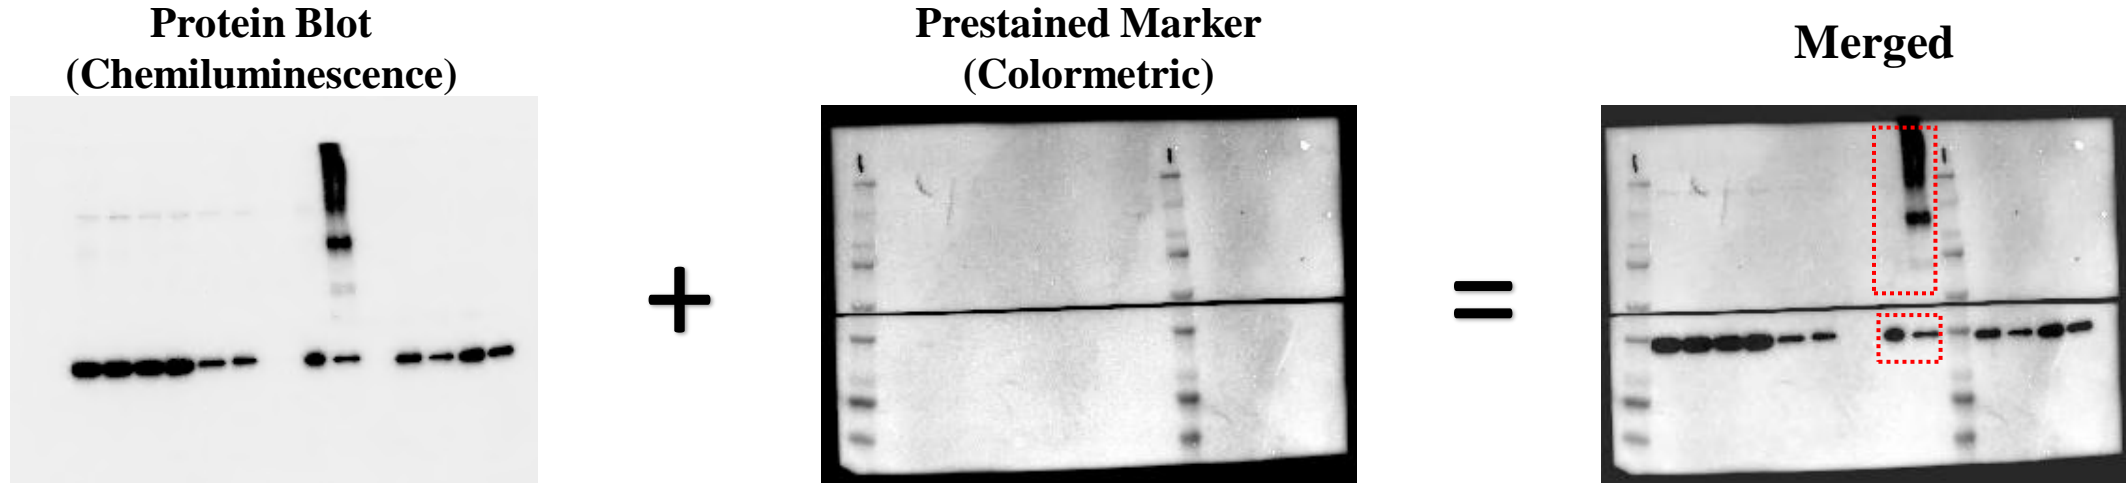

# Full unedited gel for **Figure 3C**

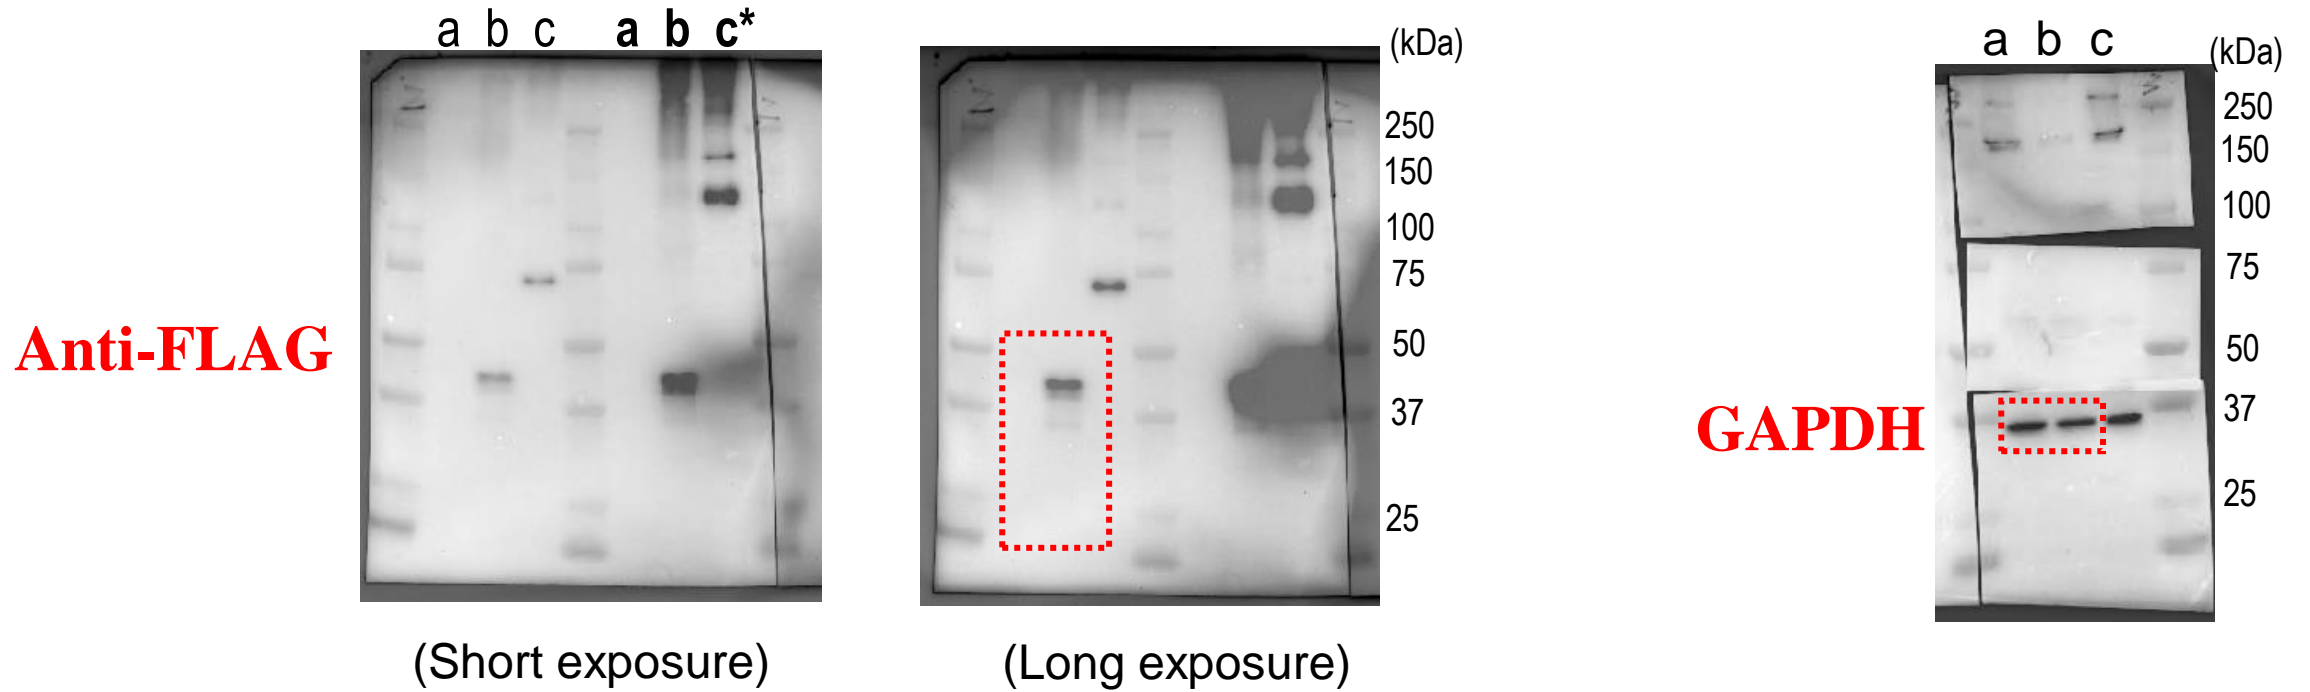

## Sample info:

- a: EV
- b: OE (TMEM158-FLAG)
- c: OE (CDCP1-FLAG)

\***a, b, c** in **bold** are same protein samples loaded 5X more in protein amount.

# Full unedited gel for **Figure 3D**

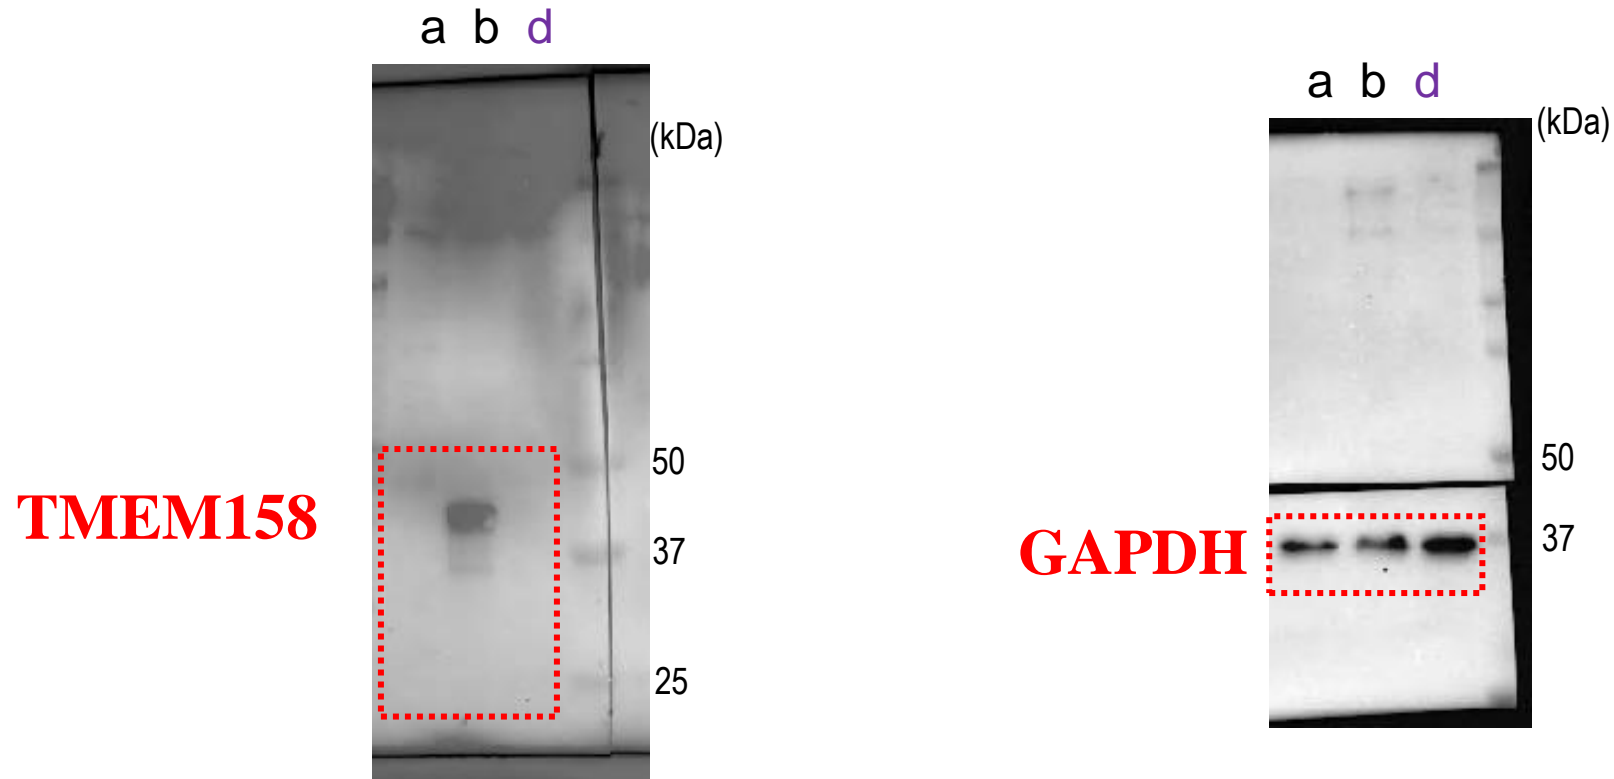

## Sample info:

**a:** EV

**b:** OE (TMEM158-FLAG)

**d:** HCFs

# Full unedited gel for **Figure 4B**

**CDCP1**

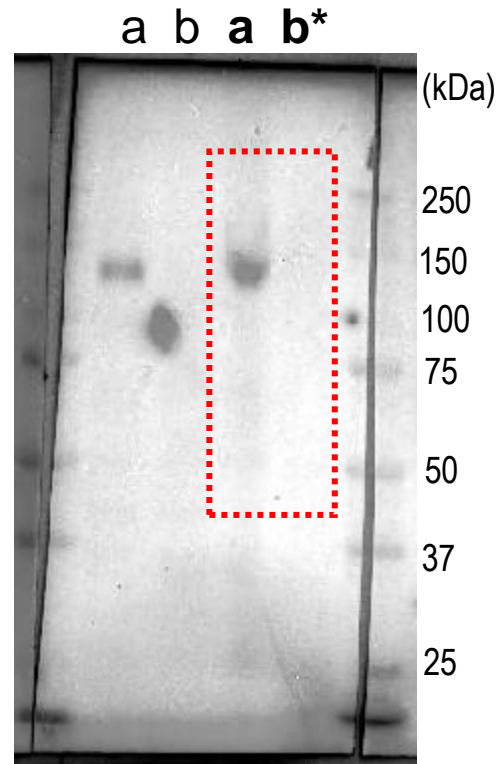

**GAPDH**

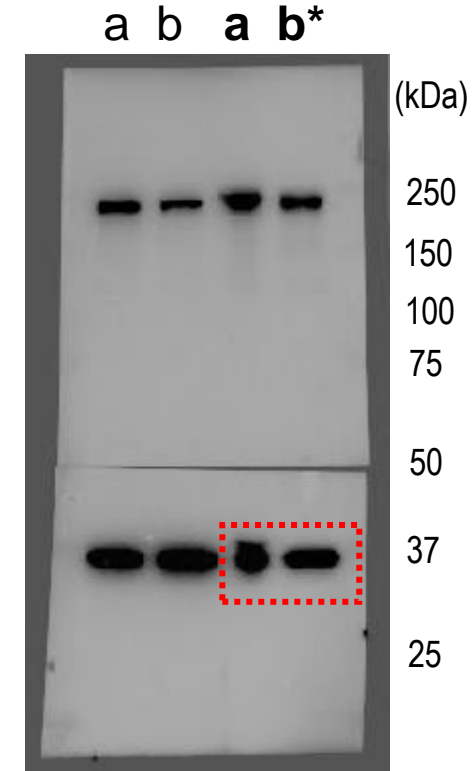

## Sample info:

a: Ctrl siRNA

b: siCDCP1 (KD)

\***a, b** in **bold** are same protein samples with duplicate loading

# Full unedited gel for Figure 4E

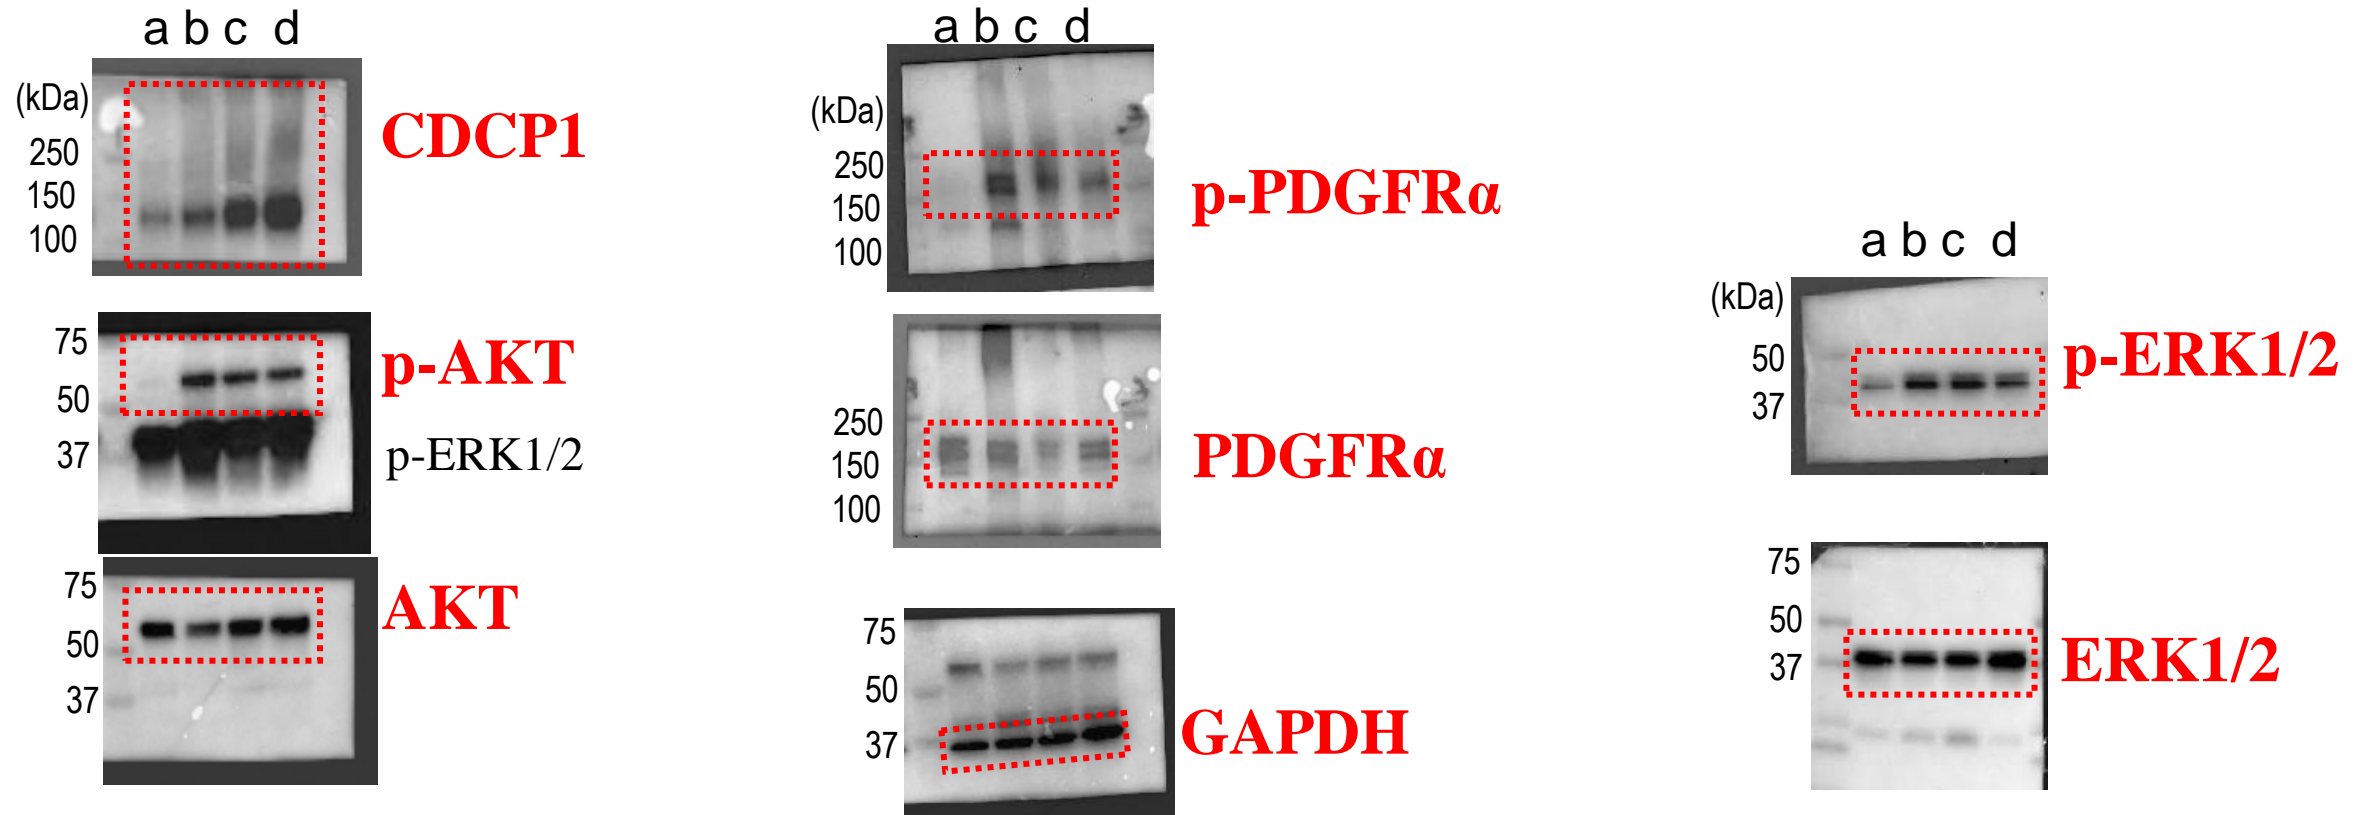

## Sample info:

**a:** 0 hr (control treatment); **b:** 10 hrs; **c:** 24 hrs; **d:** 48 hrs

# Full unedited gel for Figure 4J

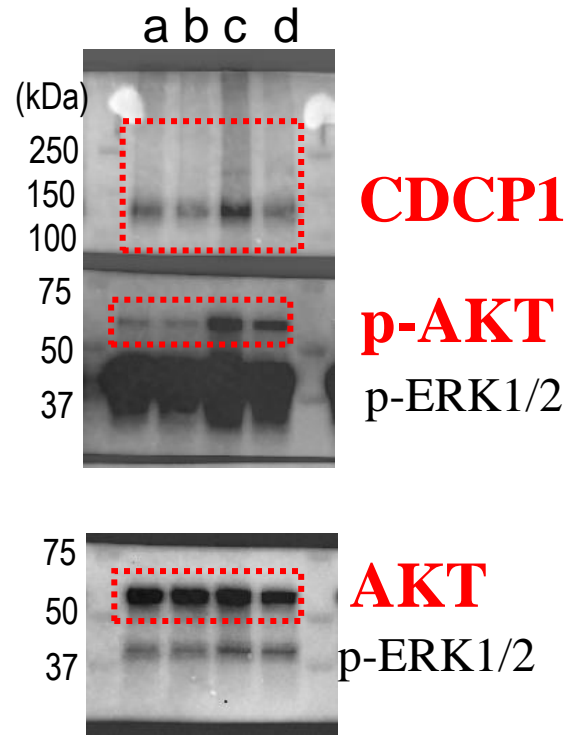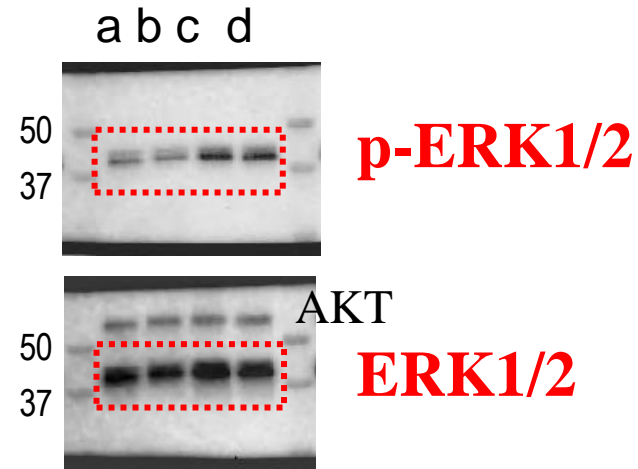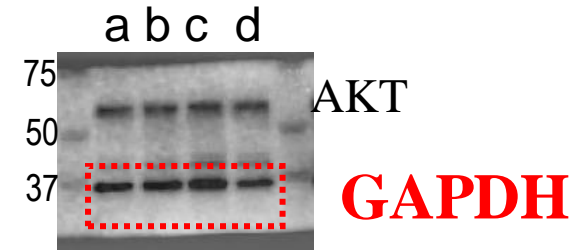

## Sample info:

- a:** Vehicle, CDCP1 KD-; **b:** Vehicle, CDCP1 KD +;
- c:** PDGF-BB, CDCP1 KD-; **d:** PDGF-BB, CDCP1 KD +;

# Full unedited gel for Figure 5C

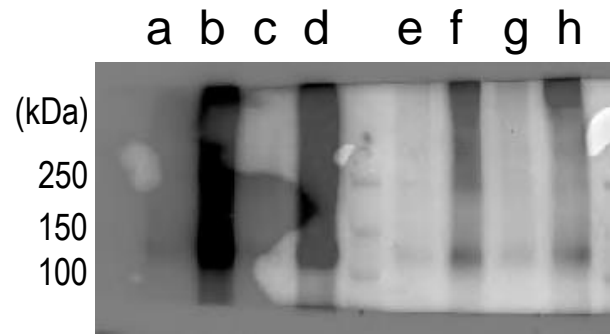

**CDCP1**

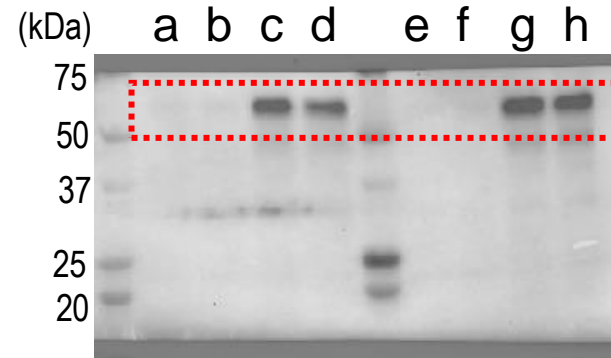

**p-SMAD2**

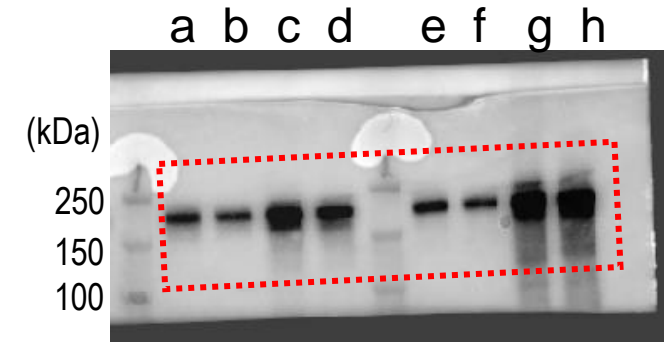

**COL1A1**

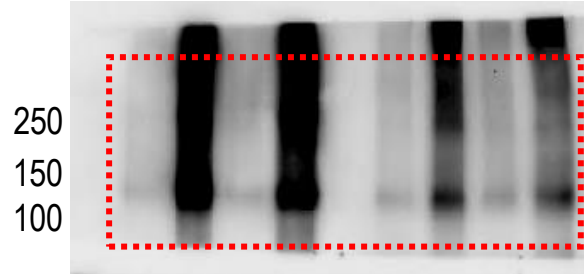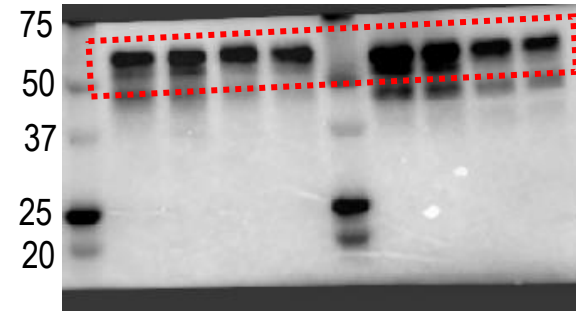

**SMAD2/3**

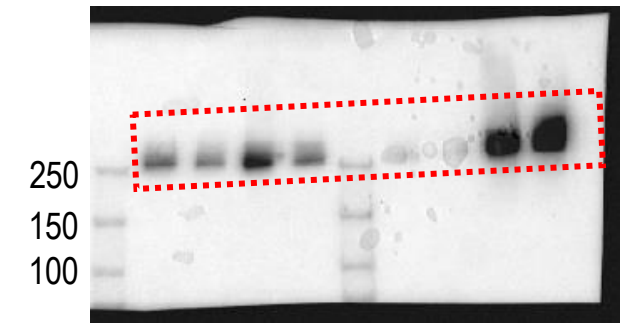

**FN-1**

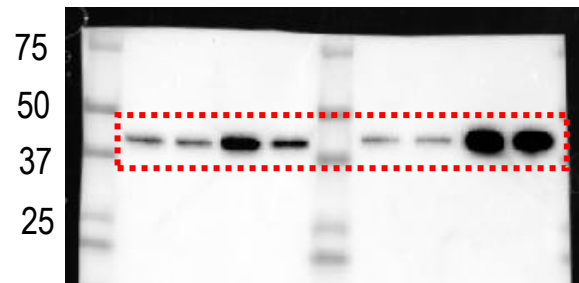

**$\alpha$ -SMA**

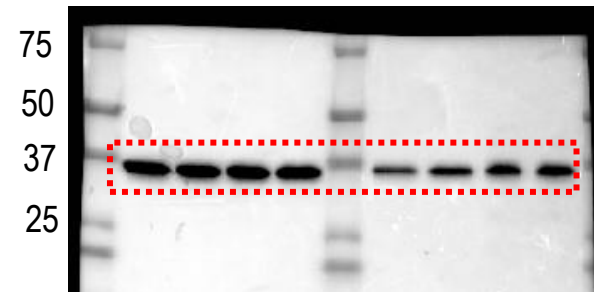

**GAPDH**

## Sample info:

**a:** Vehicle, CDCP1 OE-; **b:** Vehicle, CDCP1 OE+; **c:** TGF- $\beta$ 1, CDCP1 OE-; **d:** TGF- $\beta$ 1, CDCP1 OE+, (24hrs);  
**e:** Vehicle, CDCP1 OE-; **f:** Vehicle, CDCP1 OE+; **g:** TGF- $\beta$ 1, CDCP1 OE-; **h:** TGF- $\beta$ 1, CDCP1 OE+, (72hrs);



# Full unedited gel for **Figure 5E**

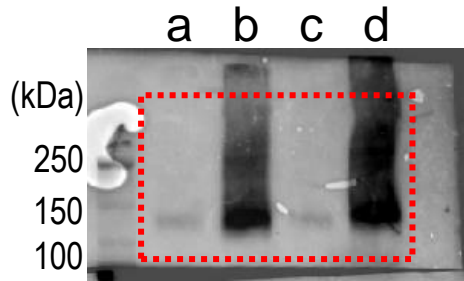

**CDCP1**

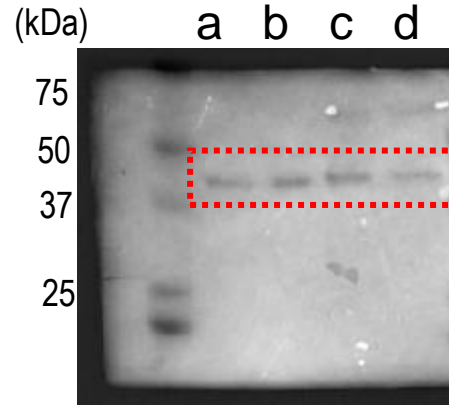

**$\alpha$ -SMA**

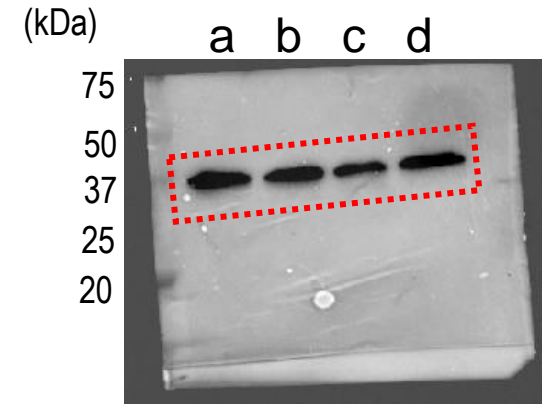

**GAPDH**

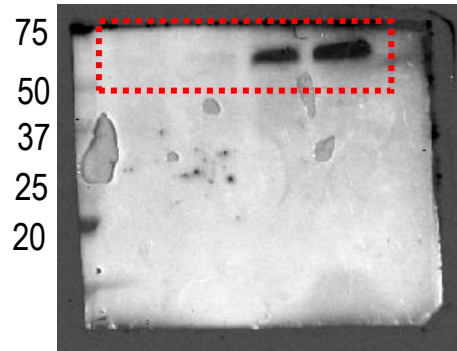

**p-SMAD2**

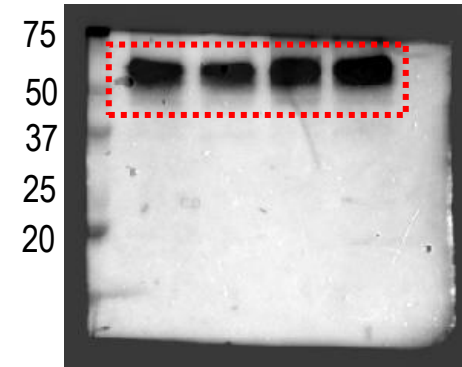

**SMAD2/3**

## Sample info:

**a:** Vehicle, CDCP1 OE-; **b:** Vehicle, CDCP1 OE+; **c:** TGF- $\beta$ 1, CDCP1 OE-; **d:** TGF- $\beta$ 1, CDCP1 OE+, (0.5 hrs);
